# Supplementary material for: Exploring the K+ binding site and its coupling to transport in the neurotransmitter:sodium symporter LeuT
Source: eLife journal article supplement (doi:10.7554/elife.87985), 2023-06-23
Supplement: fig1-data1 [file Figure 1-Source data 1.xlsx]

## Sheet: Sheet1
Source data for: Figure 1
Panel	A
[Na+] (mM)	0 mM K+			200 mM K+			800 mM K+
0.1	0	-2.22045e-16	2.37079e-16	-2.22045e-16	-2.22045e-16	0	-2.03541e-16	-2.59052e-16	2.03541e-16
0.468	4.77543	4.16886	4.04966	1.00956	0.884483	0.85083	0.0723746	0.90369	0.0487907
1	9.59145	8.58605	10.1658	2.00565	1.97484	2.09963	0.224361	0.97063	0.181223
2.14	21.2054	21.7849	23.1481	5.45834	5.90926	6.52532	0.991532	1.18819	0.68307
4.68	40.5438	38.3475	42.3881	16.1125	15.5242	17.0715	3.24238	3.80721	3.62445
10	59.5644	59.3724	59.8283	32.7298	34.1594	34.4175	9.03235	10.2837	9.82784
21.4	70.8198	70.69	76.477	53.0287	54.533	54.3159	24.3541	26.115	24.6881
46.8	79.4575	77.4099	86.2928	71.9074	72.3065	73.7546	48.5851	49.4101	48.1425
100	89.793	90.6878	91.4132	83.8269	84.1937	83.9852	71.1442	74.1361	75.2213
214	93.9529	95.0109	96.2003	91.3111	94.5482	91.526	86.3719	88.5031	87.8163
468	99.3168	97.3587	99.0084	98.0415	98.6047	98.1405	95.093	96.561	96.1839
800	99.3777	99.9398	100.458	99.0376	97.7354	99.3619	98.6755	97.0881	98.5014
Panel	B
[K+] (mM)
0.2	100	100	100	100	100	100
0.936	99.8944	97.0203	99.6232	97.4446	101.714	101.168
2	97.2361	98.0519	100.377	95.5865	103.538	103.438
4.28	94.5825	96.2558	97.2913	95.0894	103.883	101.858
9.36	96.7802	97.9253	100.242	99.8238	105.245	103.699
20	95.1536	94.9686	94.0637	93.5668	95.7516	97.633
42.8	82.3464	88.4956	89.9047	85.2465	88.4082	89.1579
93.6	70.2303	72.874	77.0913	72.0374	72.7764	74.9924
200	54.6209	56.5524	60.292	56.7506	56.7082	58.236
428	30.0048	31.3284	33.8144	29.3936	35.2903	37.8897
936	12.1689	12.4853	13.9106	12.7338	15.9184	18.1185
1600	7.98464	7.71409	10.0028	7.63254	10.9728	10.2004
