# Supplementary material for: Exploring the K+ binding site and its coupling to transport in the neurotransmitter:sodium symporter LeuT
Source: eLife journal article supplement (doi:10.7554/elife.87985), 2023-06-23
Supplement: fig1-figsupp1-data1 [file Figure 1-figure supplement 1-Source data 1.xlsx]

## Sheet: Sheet1
Source data for: Figure 1-figure supplement 1
[K+] (mM)	ChCl 1.6 M						ChCl 0.2 M			NMDGCl 0.2 M
0.2	100	100	100	100	100	100	100	100	100	100	100	100
0.936	99.8944	97.0203	99.6232	97.4446	101.714	101.168	99.2518	97.0255	100.046	102.729	96.2489	97.2671
2	97.2361	98.0519	100.377	95.5865	103.538	103.438	107.097	100.647	106.439	101.979	96.5101	104.093
4.28	94.5825	96.2558	97.2913	95.0894	103.883	101.858	99.2736	99.1562	105.537	97.9651	100	100.376
9.36	96.7802	97.9253	100.242	99.8238	105.245	103.699	101.729	105.267	108.926	104.736	99.7321	104.713
20	95.1536	94.9686	94.0637	93.5668	95.7516	97.633	102.731	96.3223	98.634	102.861	96.135	98.6006
42.8	82.3464	88.4956	89.9047	85.2465	88.4082	89.1579	94.3633	90.8516	90.8621	96.1942	90.3878	92.6728
93.6	70.2303	72.874	77.0913	72.0374	72.7764	74.9924	82.5016	72.3578	71.8103	86.4643	77.748	79.794
200	54.6209	56.5524	60.292	56.7506	56.7082	58.236	57.6233	58.3081	61.2865	59.4555	54.0023	52.6965
428	30.0048	31.3284	33.8144	29.3936	35.2903	37.8897
936	12.1689	12.4853	13.9106	12.7338	15.9184	18.1185
1600	7.98464	7.71409	10.0028	7.63254	10.9728	10.2004
