# Supplementary material for: Exploring the K+ binding site and its coupling to transport in the neurotransmitter:sodium symporter LeuT
Source: eLife journal article supplement (doi:10.7554/elife.87985), 2023-06-23
Supplement: fig2-data1 [file Figure 2-Source data 1.xlsx]

## Sheet: Sheet1
Source data for: Figure 2
Panel	B
NMDG+	Na+	Na++Ala	Na++Leu	K+	Rb+
0.346193	0.375954	0.390405	0.297927	0.501634	0.444569
0.335678	0.383074	0.384231	0.297692	0.506507	0.423703
0.346287	0.335723	0.388596	0.286434	0.485559	0.411057
0.32971	0.360957	0.399855	0.28084	0.478692	0.45001
0.355251	0.375095	0.389041	0.305077	0.504769	0.432276
Panel	C
[Ion] mM	Na+				K+
1.584	1	1	1	1	1	1	1	1	1
2.511	1.00394	0.997873	1.00648	0.992209	1.0035	1.00464	0.994297	1.00573	1.00394
3.981	1.00812	1.00223	1.00365	0.98028	1.00266	1.00143	0.995671	1.00712	1.0021
6.309	1.00933	0.993163	1.01124	1.00057	1.00556	1.00706	0.998202	1.00655	1.01718
10	0.998896	0.98655	1.01354	1.00219	1.00705	1.01062	1.00012	1.01237	1.04004
15.84	1.01096	0.991886	1.01531	1.00179	1.01812	1.01961	1.00556	1.02109	1.04232
25.11	1.01007	0.995755	1.01856	1.00138	1.04754	1.04709	1.0324	1.05226	1.05002
39.81	0.99924	1.00972	1.02318	1.00763	1.06597	1.07194	1.04305	1.06786	1.08864
63.09	0.984884	1.0188	1.00852	1.01438	1.10469	1.09545	1.07862	1.10579	1.11028
100	0.986175	0.966566	1.0094	0.993296	1.14835	1.14975	1.12762	1.15462	1.16082
158.4	0.972092	1.0007	0.996761	0.99969	1.2014	1.20673	1.17153	1.19937	1.17115
251.1	0.972183	0.950923	0.991441	0.998601	1.25586	1.25884	1.22098	1.25502	1.28283
398.1	0.962385	0.97683	0.991989	1.00767	1.31253	1.31669	1.27284	1.31087	1.34411
630.9	0.980118	0.942339	1.00361	1.01457	1.36822	1.3623	1.3318	1.36921	1.37666
1000	1.00044	0.976637	1.01823	1.02944	1.39621	1.38369	1.34329	1.38949	1.38551
1584	1.01662	0.9607		0.98415	1.4111	1.40722	1.36919	1.40888	1.38282
