# Supplementary material for: Exploring the K+ binding site and its coupling to transport in the neurotransmitter:sodium symporter LeuT
Source: eLife journal article supplement (doi:10.7554/elife.87985), 2023-06-23
Supplement: fig3-figsupp1-data1 [file Figure 3-figure supplement 1-Source data 1.xlsx]

## Sheet: Sheet1
Source data for: Figure 3 - figure supplement 1
Panel	A
	Rb+ binding			Na+ binding			Cs+ binding			NMDG+ binding			K+ binding
c.p.m.	352.5	347.5	336.5	436.5	428.5	441.5	342	322	330	401.5	416.5	416.5	476	465	487
Panel	B
[Ala], uM	0 mM KCl (%)			50 mM KCl			100 mM KCl			150 mM KCl			200 mM KCl
0.05	0	1.85083	2.56907	0	2.00521	2.68282	0	2.66994	2.67569	0	5.68757	5.72167	0	7.62103	6.25045
0.2	5.32572	3.72209	5.20153	6.23647	4.40826	5.43696	8.74387	7.26005	7.5071	6.78012	9.87175	10.3567	13.0897	16.3795	16.1422
0.5	11.7841	6.92938	10.6305	18.6076	9.92971	13.2883	17.1024	12.5045	14.2789	20.4731	20.805	18.1496	32.7423	37.1211	31.3637
2	34.7763	15.045	29.5095	46.5477	20.7548	27.0861	54.1039	31.1823	42.9757	71.2206	50.5281	52.8718	101.553	90.287	80.1197
3.5	64.2632	27.9037	43.3105	85.8184	47.6525	60.8368	90.7329	56.2465	76.4806	88.9535	64.8258	70.2585	121.857	135.8	118.871
5	67.3078	43.9486	58.6152	110.151	57.1909	77.342	114.2	82.7173	77.8972	106.331	80.5407	84.9354	160.45	143.048	106.623
8	66.8868	46.233	62.6504	80.0156	66.3497	71.2049	83.8453	79.5856	73.1118	106.482	104.191	85.2995	127.617	151.727	132.582
Panel	C
[NaCl] mM	KCl inside (%)
0	7.33153	19.8122	13.3809
3	10.5852	43.1318	11.1034
10	23.5881	52.9058	23.8709
33	54.8059	77.7517	54.9651
50	65.709	88.6851	56.5754
100	93.0845	98.1362	85.2235
150	100	100	100
