# Supplementary material for: Exploring the K+ binding site and its coupling to transport in the neurotransmitter:sodium symporter LeuT
Source: eLife journal article supplement (doi:10.7554/elife.87985), 2023-06-23
Supplement: fig4-data1 [file Figure 4-Source data 1.xlsx]

## Sheet: Sheet1
Source data for: Figure 4
Panel	B
[Na] (mM)	WT			A22V			A22S			N27Q			N286Q			T254S
0.0468										-6.80937e-15	-6.51331e-15	0.20552
0.1	0	-2.22045e-16	2.37079e-16	6.73371	9.14665	4.36534	0	4.62593e-16	-5.18104e-16	6.80582	1.47463	-6.66134e-15	-6.66134e-15	-4.58892e-15	0	3.40881	3.90468	6.37219
0.214										10.4513	7.46711	5.76923
0.468	4.77543	4.16886	4.04966	23.4514	23.3861	18.3747	0.0179211	1.91272	1.37144	17.1542	13.3439	8.58779	1.19377	2.07098	2.44723	5.84368	6.40253	9.09969
1	9.59145	8.58605	10.1658	35.6726	35.1048	31.8159	1.39785	3.09411	3.68076	31.5596	29.4636	31.4005	2.6787	2.27204	0.774957	8.66813	9.47459	11.1755
2.14	21.2054	21.7849	23.1481	49.898	49.4919	51.4419	3.48566	6.9517	6.52982	48.8608	47.7664	46.5796	4.60038	4.21233	3.98695	15.8266	16.5088	20.6131
4.68	40.5438	38.3475	42.3881	68.7363	68.739	70.2913	9.38172	14.265	15.5548	67.044	62.1512	64.2543	9.47736	10.1035	9.89089	29.5593	29.0554	32.7782
10	59.5644	59.3724	59.8283	78.3705	75.308	83.078	16.828	23.5393	26.1812	82.471	80.2877	77.0332	20.84	20.4685	20.363	43.4867	42.6644	45.7881
21.4	70.8198	70.69	76.477	89.5606	84.6931	91.0464	26.8011	35.522	37.5774	94.7229	94.0581	95.4198	36.0314	27.6968	27.8271	56.3428	55.814	58.1704
46.8	79.4575	77.4099	86.2928	92.5557	88.3949	95.383	40.6183	47.0224	51.69	98.9122	97.9182	99.3834	49.0173	40.9621	40.3283	70.6112	65.9202	66.6908
100	89.793	90.6878	91.4132	97.1251	97.2861	99.9712	57.2133	64.687	65.4574	101.396	98.9302	97.8714	71.6553	63.6574	60.2223	82.2985	77.9788	75.9112
214	93.9529	95.0109	96.2003	100.845	99.9886	101.187	70.9229	75.8338	78.057	91.9888	94.3039	95.2877	86.097	76.0531	74.9159	86.5108	87.7692	81.2696
468	99.3168	97.3587	99.0084	99.4024	97.587	99.1945	82.2043	84.4571	86.0998				89.7511	84.6989	82.2729	94.4485	93.4252	89.7659
800	99.3777	99.9398	100.458	96.5238	98.2286	98.2021										97.1756	93.9994	96.5001
Panel	C
[K+] (mM)	WT						A22V			A22S			N27Q			N286Q			T254S
0.2	100	100	100	100	100	100	100	100	100	100	100	100	100	100	100	100	100	100	100	100	100
0.936	99.8944	97.0203	99.6232	97.4446	101.714	101.168	97.5952	99.4067	94.0519	97.6139	99.7301	94.3073	94.7035	96.9197	91.8687	92.5926	97.6901	93.6426	101.443	104.042	103.557
2	97.2361	98.0519	100.377	95.5865	103.538	103.438	95.4765	96.7509	95.0581	100.617	98.9032	96.4468	96.2885	98.1476	94.5059	97.0074	97.2651	91.9824	101.181	103.911	107.092
4.28	94.5825	96.2558	97.2913	95.0894	103.883	101.858	91.9656	93.3489	90.2724	100.8	99.3576	96.6691	101.777	98.6125	90.5967	90.4	99.4271	90.8105	103.386	103.713	107.122
9.36	96.7802	97.9253	100.242	99.8238	105.245	103.699	85.4677	87.5372	84.8442	104.482	100.943	101.165	97.9527	103.913	98.122	93.9753	101.183	100.43	102.394	101.081	103.116
20	95.1536	94.9686	94.0637	93.5668	95.7516	97.633	70.381	74.2687	69.6102	101.491	102.173	97.0378	99.6038	98.8761	94.2062	97.6296	101.95	99.1602	100.279	97.4899	97.5712
42.8	82.3464	88.4956	89.9047	85.2465	88.4082	89.1579	54.0109	56.3389	52.0827	102.415	101.138	97.3	97.0215	100.722	94.1063	94.9926	101.525	90.752	89.3736	90.6741	93.4534
93.6	70.2303	72.874	77.0913	72.0374	72.7764	74.9924	31.9276	32.3384	31.1394	98.2726	99.115	92.5573	96.6055	99.1605	92.3415	99.4864	100.776	93.252	80.961	76.8356	75.2485
200	54.6209	56.5524	60.292	56.7506	56.7082	58.236	18.0104	18.4039	17.6993	97.208	95.4179	91.6833	100.535	102.206	97.1564	104.909	107.447	98.6133	56.2398	54.2916	52.5297
428	30.0048	31.3284	33.8144	29.3936	35.2903	37.8897	8.06733	9.28099	7.81776	83.5584	83.3151	74.7991	90.5759	91.5083	85.5954	83.042	102.051	92.6074	32.0023	33.8723	29.7885
936	12.1689	12.4853	13.9106	12.7338	15.9184	18.1185	4.25769	4.42544	4.14984	64.9461	66.7532	58.8117	79.8375	78.9857	83.8039	73.1951	82.8606	69.3555	11.5694	12.7386	9.89463
1600	7.98464	7.71409	10.0028	7.63254	10.9728	10.2004	3.22491	3.58596	3.13915	59.1549	62.195	55.9368	63.2677	61.9259	64.9174	57.2741	69.0844	55.6152	8.18301	6.50559	5.50034
