# Supplementary material for: Exploring the K+ binding site and its coupling to transport in the neurotransmitter:sodium symporter LeuT
Source: eLife journal article supplement (doi:10.7554/elife.87985), 2023-06-23
Supplement: fig5-data1 [file Figure 5-Source data 1.xlsx]

## Sheet: Sheet1
Source data for: Figure 5
	WT									Panel A: A22V									Panel B: A22S									Panel C: N27Q						Panel E: N286Q						Panel F: E290Q						Panel D: T254S
[Na] (mM)	0 mM K+			200 mM K+			800 mM K+			0 mM K+			200 mM K+			800 mM K+			0 mM K+			200 mM K+			800 mM K+			0 mM K+			200 mM K+			0 mM K+			800 mM K+			0 mM K+			800 mM K+			0 mM K+			200 mM K+
0.0468																												-6.80937e-15	-6.51331e-15	0.20552	3.25665e-15	-2.96059e-15	-3.25665e-15
0.1	0	-2.22045e-16	2.37079e-16	-2.22045e-16	-2.22045e-16	0	-2.03541e-16	-2.59052e-16	2.03541e-16	6.73371	9.14665	4.36534	-4.44089e-16	-3.70074e-16	-3.70074e-16	3.51571e-16	0.0450907	0	0	4.62593e-16	-5.18104e-16	-4.81097e-16	0	5.18104e-16	0.13225	4.44089e-16	4.07082e-16	6.80582	1.47463	-6.66134e-15	5.49286	0.756918	3.24317	-6.66134e-15	-4.58892e-15	0	1.01463	3.20432	5.62513e-15	0	1.92439e-15	-1.86888e-15	8.14164e-16	-8.14164e-16	-8.14164e-16	3.40881	3.90468	6.37219	-1.4803e-16
0.214																												10.4513	7.46711	5.76923	10.7682	6.77503	3.57439
0.468	4.77543	4.16886	4.04966	1.00956	0.884483	0.85083	0.0723746	0.90369	0.0487907	23.4514	23.3861	18.3747	1.88926	0.745655	2.54161	0.821129	0.0789088	0.530844	0.0179211	1.91272	1.37144	0.265167	0.604182	1.25472	0	0.135077	0.207053	17.1542	13.3439	8.58779	10.8226	10.8326	8.43914	1.19377	2.07098	2.44723	2.98537	1.72154	1.07087	5.86569	8.66086	7.67022	1.31782	0.390107	1.24924	5.84368	6.40253	9.09969	1.08145
1	9.59145	8.58605	10.1658	2.00565	1.97484	2.09963	0.224361	0.97063	0.181223	35.6726	35.1048	31.8159	2.17196	2.1078	3.05767	0.864024	0	0.70169	1.39785	3.09411	3.68076	0.851748	2.06694	1.70576	0.151143	0.21328	0.240449	31.5596	29.4636	31.4005	22.3521	20.2631	19.5142	2.6787	2.27204	0.774957	1.65854	0.427243	2.238	12.5354	15.0792	13.3962	1.45801	1.03047	1.41897	8.66813	9.47459	11.1755	1.21951
2.14	21.2054	21.7849	23.1481	5.45834	5.90926	6.52532	0.991532	1.18819	0.68307	49.898	49.4919	51.4419	5.84707	4.7264	6.6443	1.66677	0.941269	1.01898	3.48566	6.9517	6.52982	1.76778	3.83973	4.12498	0.497512	1.22992	1.36254	48.8608	47.7664	46.5796	36.0843	30.7979	32.9561	4.60038	4.21233	3.98695	8.88178e-15	-5.62513e-15	2.34629	21.5024	25.7686	23.0681	2.71975	1.46474	2.01643	15.8266	16.5088	20.6131	2.76116
4.68	40.5438	38.3475	42.3881	16.1125	15.5242	17.0715	3.24238	3.80721	3.62445	68.7363	68.739	70.2913	15.0796	12.4883	15.4883	3.75023	2.52508	3.06303	9.38172	14.265	15.5548	5.2953	9.58741	9.22585	2.41199	3.66842	4.17446	67.044	62.1512	64.2543	52.862	47.5865	52.5669	9.47736	10.1035	9.89089	2.2439	3.71953	5.82361	37.0702	41.5055	38.146	5.55166	4.39423	4.15507	29.5593	29.0554	32.7782	7.75426
10	59.5644	59.3724	59.8283	32.7298	34.1594	34.4175	9.03235	10.2837	9.82784	78.3705	75.308	83.078	29.5525	26.3034	30.2542	7.95392	6.7467	7.85893	16.828	23.5393	26.1812	11.9888	17.8234	18.4435	4.74841	9.14261	9.65135	82.471	80.2877	77.0332	70.1428	61.6702	67.2647	20.84	20.4685	20.363	6.90732	7.65268	5.42654	50.9687	54.2235	51.0172	9.56119	7.99352	8.61566	43.4867	42.6644	45.7881	18.2697
21.4	70.8198	70.69	76.477	53.0287	54.533	54.3159	24.3541	26.115	24.6881	89.5606	84.6931	91.0464	50.1	45.4263	51.2256	19.4436	17.281	19.0494	26.8011	35.522	37.5774	21.6392	29.4062	30.0394	11.531	17.8658	18.7216	94.7229	94.0581	95.4198	86.1727	77.553	81.2862	36.0314	27.6968	27.8271	8.62439	15.4184	17.7837	65.7784	66.9493	60.1148	16.3606	14.5665	14.7057	56.3428	55.814	58.1704	35.2048
46.8	79.4575	77.4099	86.2928	71.9074	72.3065	73.7546	48.5851	49.4101	48.1425	92.5557	88.3949	95.383	66.3173	64.4728	69.0427	38.2989	36.2642	37.1896	40.6183	47.0224	51.69	36.2153	44.0814	43.7264	23.7295	32.8025	29.475	98.9122	97.9182	99.3834	94.7655	89.3287	96.0806	49.0173	40.9621	40.3283	20.9561	27.3184	24.4014	75.871	76.6403	71.6489	27.3097	24.4958	25.7316	70.6112	65.9202	66.6908	55.1312
100	89.793	90.6878	91.4132	83.8269	84.1937	83.9852	71.1442	74.1361	75.2213	97.1251	97.2861	99.9712	85.6512	83.2374	85.7825	62.1239	61.0247	59.1616	57.2133	64.687	65.4574	50.7352	61.1257	59.0946	39.6121	51.9906	49.9866	101.396	98.9302	97.8714	97.9062	95.1979	98.7579	71.6553	63.6574	60.2223	52.6146	41.5871	42.2452	91.2015	88.5658	82.4446	44.0067	41.506	38.4072	82.2985	77.9788	75.9112	71.8132
214	93.9529	95.0109	96.2003	91.3111	94.5482	91.526	86.3719	88.5031	87.8163	100.845	99.9886	101.187	94.87	91.5864	93.246	80.8383	80.5039	78.6839	70.9229	75.8338	78.057	64.54	74.1315	72.3471	56.2315	70.4109	65.0748	91.9888	94.3039	95.2877	93.5146	91.6739	92.7132	86.097	76.0531	74.9159	72.5268	60.4675	64.5169	96.3167	95.523	90.3527	65.0147	59.9441	56.9081	86.5108	87.7692	81.2696	79.6364
468	99.3168	97.3587	99.0084	98.0415	98.6047	98.1405	95.093	96.561	96.1839	99.4024	97.587	99.1945	94.6632	93.3419	97.4971		92.5544	90.756	82.2043	84.4571	86.0998	80.0884	85.3724	84.0331	75.1055	84.2599	80.37							89.7511	84.6989	82.2729	91.7073	76.9791	77.6922	94.9307	96.3074	92.5677	76.2793	74.7755	68.9388	94.4485	93.4252	89.7659	90.7501
800	99.3777	99.9398	100.458	99.0376	97.7354	99.3619	98.6755	97.0881	98.5014	96.5238	98.2286	98.2021	97.5453	99.8356	97.5229	95.7657	95.7446	94.5817																						95.3748	93.5658	93.8966	86.0367	83.6081	80.019	97.1756	93.9994	96.5001	98.4584
[truncated: 13 more columns]
