# Supplementary material for: Exploring the K+ binding site and its coupling to transport in the neurotransmitter:sodium symporter LeuT
Source: eLife journal article supplement (doi:10.7554/elife.87985), 2023-06-23
Supplement: fig6-data1 [file Figure 6-Source data 1.xlsx]

## Sheet: Sheet1
Source data for Figure 6
Panel	A
Ion	WT					N286Q
NMDG+	0.346193	0.335678	0.346287	0.32971	0.355251	0.31368	0.338033	0.321274	0.323685
Na+	0.375954	0.383074	0.335723	0.360957	0.375095	0.341212	0.342637	0.336407	0.336148
Na++Leu	0.297927	0.297692	0.286434	0.28084	0.305077	0.299732	0.307467	0.278651	0.28881
K+	0.501634	0.506507	0.485559	0.478692	0.504769	0.453909	0.458438	0.423869	0.451756
Panel	B
Ion	N27Q
NMDG+	0.101253	0.127326	0.113123	0.143233
Na+	0.187353	0.192584	0.199212	0.213121
Na++Leu	0.238224	0.227273	0.228826	0.232121
K+	0.155019	0.148774	0.14843	0.158678
Panel	C
Ion	A22V
NMDG+	0.277637	0.281544	0.274924	0.296925
Na+	0.307135	0.326768	0.287007	0.330941
Na++Leu	0.162749	0.163492	0.148805	0.163574
K+	0.338544	0.339686	0.315572	0.336015
Panel	D
Ion	A22S
NMDG+	0.304569	0.326602	0.321504	0.315986
Na+	0.22499	0.274817	0.254853	0.257322
Na++Leu	0.181658	0.201035	0.214473	0.200141
K+	0.365844	0.411899	0.407484	0.39707
Panel	E
Ion	T254S
NMDG+	0.44252	0.435222	0.425492	0.446355
Na+	0.379325	0.358553	0.380089	0.372668
Na++Leu	0.270744	0.261269	0.274181	0.267113
K+	0.490223	0.490783	0.495693	0.49517
