# Supplementary material for: Exploring the K+ binding site and its coupling to transport in the neurotransmitter:sodium symporter LeuT
Source: eLife journal article supplement (doi:10.7554/elife.87985), 2023-06-23
Supplement: fig6-figsupp1-data1 [file Figure 6-figure supplement 1-Source data 1.xlsx]

## Sheet: Sheet1
Source Data for: Figure 6 - figure supplement 1
Panel	A	A22V Time dependent alanine uptake
time (min)	K+			NMDG+			Na+
1	75.6137	47.9883	71.8774	74.8107	70.3801	90.4316	40.4886	66.8563	49.6353
3	88.6442	94.3257	87.0556	86.1023	98.2751	103.179	57.0337	88.2677	51.3463
6	103.565	98.1548	97.8304	96.724	107.173	102.44	54.2257	86.3578	52.8003
10	104.735	103.33	101.463	97.4765	97.4195	112.954	56.6827	77.6915	49.3739
20	105.905	81.9367	95.8763	102.395	104.356	92.8856	60.1193	73.9271	51.0114
40	106.465	99.6115	88.5051	105.286	96.7166	96.8075	61.4682	82.4824	50.25
60	115.632	109.795	87.5097	107.515	93.6783	91.7527	64.4827	89.9186	47.2043
Panel	B	A22S Time dependent alanine uptake
time (min)	K+			NMDG+			Na+
1	67.5359	67.0296	70.1939	50.3271	15.609	19.3251	39.7227	26.448	12.6329
3	103.303	100.374	128.63	65.3207	23.6023	39.0398	53.2047	27.6194	19.3489
6	174.531	179.837	246.302	53.5825	31.3612	50.0387	49.5278	28.7388	10.1009
10	227.253	265.429	293.035	33.6465	41.0078	56.6344	38.3966	28.14	18.9987
20	393.438	405.754	474.969	32.292	60.3922	71.8916	39.0999	27.3721	16.6014
40	566.724	566.824	699.91	110.919	99.4863	93.2824	32.4493	32.4222	29.1086
60	670.115	700.678	772.931	100.654	92.7037	111.973	27.1047	36.5092	9.58016
Panel	C	T254S Time dependent alanine uptake
Time (min)	K+			NMDG+			Na+
1	61.5077	34.4785	42.2118	54.058	27.5734	41.2154	32.9656	29.7244	17.2092
3	90.6436	71.1452	54.3552	75.3985	25.0503	49.896	38.3592	23.3152	18.7698
6	115.398	106.368	81.8677	71.4151	39.3446	60.5756	32.7817	31.5127	20.6169
10	157.373	138.536	89.0158	86.8998	58.2931	73.2936	24.2448	37.1221	23.1407
20	241.492	278.194	142.052	107.218	80.3679	77.7244	35.6274	35.6892	26.4021
40	327.639	378.686	251.965	105.566	92.9634	99.6661	38.0965	35.9003	28.7674
60	404.791	484.376	284.699	116.78	104.895	121.804	38.3066	34.0231	29.0356
