# Supplementary material for: Exploring the K+ binding site and its coupling to transport in the neurotransmitter:sodium symporter LeuT
Source: eLife. 2024 Jan 25;12:RP87985. doi: 10.7554/eLife.87985 (PMC10945697; doi:10.7554/eLife.87985)
Supplement: Figure 3—source data 4. [file elife-87985-fig3-data4.xlsx]

## Sheet: Sheet1
Source data for: Figure 3
Panel	B
time (min)	KCl (%)			RbCl			CsCl			NMDG-Cl			NaCl
2	34.1862	25.1411	50.1667	40.7869	33.8168	47.0493	21.4078	14.531	34.4779	13.3206	15.5319	18.0324	1.46478	3.55089	13.3011
4	56.9765	43.1467	74.7908	68.9236	51.2748	68.0635	27.9684	22.9548	36.014	23.9827	25.0055	30.825	2.47643	2.14045	13.3835
6	76.2753	60.5819	102.115	91.7772	72.1136	83.8398	41.5245	30.8558	51.2625	32.4263	33.6367	35.6252	3.6085	1.50293	11.8336
10	106.985	82.7195	144.343	125.991	102.5	117.806	52.2592	38.2475	53.6978	40.7032	48.0709	42.0395	6.22644	3.02899	10.7178
20	158.09	128.132	203.607	182.668	144.719	156.652	70.8296	53.2652	74.0698	62.7767	53.1048	61.8487	5.01457	2.7251	10.0802
30	190.411	154.138	232.478	214.376	169.088	211.881	81.5871	62.4192	81.5629	81.773	76.0723	77.3274	6.40559	4.44605	9.24481
45	223.687	195.34	285.085		219.668	239.127		67.99	112.575	92.6657	88.5768	92.5171	3.94572	4.32714	7.47499
60	240.15	191.8	327.486	259.285	248.867	264.525	102.688	83.1295	114.364	97.1308	102.515	102.244	5.52641	4.53193	5.76564
Panel	C
[Ala], nM	KCl (pmol/min)			RbCl			CsCl			NMDG-Cl			NaCl
0.05	0.0651852	0.0429311	0.0454923	0.0353714	0.0530866	0.0471475	0.0205582	0.0144446	0.0230634	0.0251712	0.00975	0.0193463	0.0108514	0.0080429	0.0060069
0.1	0.109458	0.100423	0.0789218	0.0769935	0.0942427	0.0890567	0.0293819	0.0376341	0.0459475	0.0280082	0.02375	0.0164226	0.0257907	0.0195421	0.0154792
0.35	0.351379	0.286166	0.205294	0.194694	0.23422	0.23176	0.139996	0.0711222	0.12142	0.132458	0.08219	0.0748028	0.0358851	0.0354282	0.0228258
0.5	0.491249	0.387215	0.401285	0.260406	0.333464	0.322739	0.143543	0.135055	0.150047	0.181563	0.09891	0.0803581	0.064906	0.0449335	0.0398299
1	0.866826	0.591858	0.599413	0.428165	0.551837	0.472537	0.271441	0.216541	0.218429	0.282763	0.13369	0.18323	0.0754542	0.0484563	0.0539226
2	1.23601	0.852867	1.03671	0.762872	0.783889	0.849056	0.508133	0.30146	0.3604	0.438381	0.23283	0.284884	0.119919	0.0852139	0.0874687
3.5	1.50834	1.02524	1.16037	1.12962	1.10238	0.946468	0.475294	0.437098	0.317862	0.568415	0.31301	0.303085	0.192295	0.123883	0.102208
5	1.50252	1.18747	1.60703	1.00371	0.954116		0.583088	0.458408	0.704197	0.401553	0.32347	0.528906	0.151918	0.187394	0.155415
Panel	D
time (min)	50 mM NaCl gra (%)			50 mM NaCl gra + 150 KCl outside			50 mM NaCl gra + 150 KCl both sides			50 mM NaCl gra + 150 KCl gra
2	52.4203	24.7843	27.9561	52.6042	29.7411	39.089	70.6189	58.6394	71.8872	74.8162	54.415	56.3952
4	62.8217	43.8591	46.2151	63.2812	36.4038	59.893	104.09	93.8692	111.798	110.57	93.7287	92.2736
6	65.8701	58.1778	54.7377	63.3119	48.6354	61.9682	134.911	113.526	137.98	147.503	120.991	115.114
10	87.7604	60.5258	62.0595	83.027	62.1714	71.8611	186.688	168.824	168.115	185.861	169.025	159.802
20	98.6366	78.7578	82.485	86.8413	78.0855	79.3657	240.87	233.353	254.503	254.09	243.538	239.102
30	95.144	91.5513	93.0305	96.492	84.407	91.1381	335.202	314.088	276.782	283.67	300.12	267.176
45	112.454	101.003	107.622	139.874	102.689	102.284	440.579	384.036	365.009	438.174	361.298	342.691
60	98.4222	110.807	102.845	111.458	112.884	109.24	296.308	439.595	373.245	328.232	382.922	346.072
Panel	E
time (min)	no gradient (c.p.m)				gradient (c.p.m.)
2		83.3333	352	914		324.333	321.333	210.667
6		308.167	788.5	1089.83		576.5	401.167	361.833
10		217.667	902.667	977.667		478	832.333	465.333
20		85.8333	672.5	790.5		484.167	1176.83	386.167
30		600.167	1236.5	1047.5		698.5	1628.5	626.833
40		380	1013.33	756		904.667	1657.67	568.667
50		210.167	1019.5	833.5		773.5	2009.17	629.5
60		172.333	916	872.333		869.667	1609.67	849.667
