# Supplementary material for: Exploring the K+ binding site and its coupling to transport in the neurotransmitter:sodium symporter LeuT
Source: eLife. 2024 Jan 25;12:RP87985. doi: 10.7554/eLife.87985 (PMC10945697; doi:10.7554/eLife.87985)
Supplement: Table 1—source data 2. [file elife-87985-table1-data2.xlsx]

## Sheet: Sheet1
Source Data for: Table 1 - Figure supplement 1
Leucine saturation binding
[leucine] (nM)	panel A: WT				Panel C: A22V			Panel E: A22S			Panel I: T254S
0.1	0	0	0	0	0	0	0	0	0	0	0	0	0
0.316	3.98966	4.12164	3.38919	4.38746	4.08895	4.96434	3.99611	3.00079	3.06	4.03299	4.89545	4.2915	3.92888
1	12.0678	11.8246	10.4124	13.0512	12.4053	14.6919	15.3125	9.16073	8.99526	11.5733	15.9164	13.6374	11.4521
3.16	29.6907	30.6885	31.5091	32.3723	32.4509	37.4566	39.1743	24.9644	24.5844	31.0042	39.0775	36.152	31.431
10	57.7096	63.021	66.4509	61.4467	65.0566	70.5065	72.929	56.0649	55.4333	60.9661	64.0713	68.219	68.2057
31.6	85.3028	84.7715	87.0634	86.8673	84.1085	87.0086	88.4802	79.7546	78.7648	83.3243	88.524	96.09	79.1225
100	96.0027	96.9281	95.3977	96.5686	95.3002	94.6425	97.2681	94.1964	92.0569	93.9641	96.187	95.4144	89.9627
316	100	100	100	100	100	100	100	100	100	100	100	100	100
Leucine homologous competition binding
[leucine] (M)	Panel G: N27Q			Panel K: N286Q			Panel M: E290Q
1e-11	100	99.3988	100	100	100	100	100	100	100	100
1e-09	99.1553	100	99.3907	96.4453	99.7901	99.9004	96.4134	97.9878	95.7279	98.7857
1e-08	99.1976	96.742	98.2501	97.3711	96.6751	98.1981	95.0493	95.0757		97.2782
3.16e-08							94.7765	89.4111	95.7976	88.178
1e-07	93.8424	94.0201	96.344	93.1478	96.5978	95.862	78.7651	77.596	78.1418	78.7806
3.16e-07	90.7087	90.234	89.0712	90.1474	88.8766	89.4332	58.8181	54.2314	63.7821	53.3259
1e-06	75.5892	74.6344	76.08	73.8713	76.2068	73.7957	32.9535	31.2578	40.8086	29.0757
3.16e-06	50.908	54.1193	52.6209	51.6288	54.435	50.4437	17.2671	16.1092	27.0962	13.8822
1e-05	31.1851	31.2317	30.0758	35.4212	36.7502	34.5527	10.5312	9.79916	18.572	8.02662
3.16e-05	21.294	21.5713	19.7172	25.5115	25.3065	21.0612
0.0001	15.9304	16.3958	14.5536	20.3109	20.6009	18.0188	6.39894	5.88481	15.0269	4.6789
0.001	11.5212	11.4316	11.5382	15.0646	15.9174	12.3144	4.95065	4.68507	12.8261	3.71221
0.01	10.1107	10.1397	10.0617	13.4415	13.6971	10.4763	4.02391	4.03964	10.4163	2.99117
Alanine competition binding
[alanine] (M)	Panel B: WT				Panel D: A22V				Panel F: A22S				Panel H: N27Q			Panel J: T254S			Panel L: N286Q			Panel N: E290Q
1e-09	100	100	96.5985	100	100	100	99.8946	100	100	100	97.5028	100	96.6181	100	100	98.816	95.6725	97.1612	98.1134	99.8306	99.8303	100	100	99.2509
1e-08			99.0444	97.6342			98.1787	98.6451			97.5697	99.1791	100	98.4265	98.5345	98.704	97.271	100	98.7766	97.6459	100	97.6673		90.1578
1e-07	94.3014	94.0881	100	98.1955	94.4567	97.4286	100	98.4076	92.3185	88.4977	100	97.7154	98.0183	99.3231	99.2332	100	100	97.6374	97.6103	99.9831	98.1474	98.4249	97.0139	100
1e-06	94.615	95.5003	95.3401	94.5131	95.5874	97.3605	95.7953	94.1752	93.8945	95.6549	95.2564	99.5418	98.5752	97.7936	97.0861	96.08	91.2671	96.4103	100	100	98.7838	97.9783	97.7049	96.7007
3.16e-06	87.6259	87.7073	86.5787	89.454	90.1041	89.1837	84.2235	86.5065	88.2376	90.2696	88.1215	92.8599				87.488	86.2573	92.8938				93.6957	96.8928	99.2509
1e-05	73.8648	73.6478	72.32	74.8914	72.9538	69.7619	69.2844	70.1495	72.8554	76.9106	73.7124	78.1087	95.7337	97.9958	98.5601	65.632	69.5322	69.0293	97.5189	97.1971	99.7879	85.4374	86.6078	88.1097
3.16e-05	49.8703	49.4225	48.6848	50.1905	48.8293	44.8435	42.0063	44.3847	50.362	53.9908	49.2252	53.2837				41.024	42.7485	41.0806				64.3951	67.43	67.7757
0.0001	26.0086	25.7633	27.7841	25.6032	27.2063	23.2041	23.7995	22.0771	26.2028	28.8829	27.1293	27.3005	81.8048	83.7553	83.1899	21.024	20.9552	19.707	87.4228	86.4171	89.6196	37.5867	40.3531	40.1458
0.000316	13.0495	13.1732	13.9796	12.7715	15.4493	12.2381	11.238	12.0757	13.8958	14.8382	12.2074	12.9566	60.6535	62.5352	60.1517	9.088	10.0195	9.08425	67.0021	63.8835	66.0868	17.4496	19.8235	18.7121
0.001	8.2675	6.85535	8.28366	7.59874	9.42566	7.42857	6.81658	6.8585	7.50208	8.72111	6.19844	7.17831	36.3495	38.7131	35.5372	4.224	5.78947	4.96337	41.9049	36.8194	40.6025	8.7806	9.84111	9.16879
0.00316													19.6446	21.8618	20.0988				23.9195	20.2642	23.462
0.01	3.75083	4.21384	4.96736	3.95643	6.75405	4.65986	3.62497	4.13466	4.35005	4.95378	3.19398	4.22553	10.809	13.3439	12.2093	1.936	3.11891	2.98535	15.5843	11.8554	14.3403	3.26581	4.28247	3.646
0.0316													9.62987	11.0847	10.3774				13.9035	10.4243	12.926
0.1	3.78098	3.50486	4.16785	3.54875	6.1737	4.14286	3.06278	3.91116	3.87597	4.36826	2.9097	3.43643	8.61448	10.065	9.38059	2.096	3.00195	3.20513	12.783	9.40808	11.7381	3.0784	3.24338	3.20768
